# Supplementary material
Source: bioRxiv or medRxiv preprint supplement (https://www.medrxiv.org/highwire/filestream/73286/field_highwire_adjunct_files/5/2020.03.05.20031500-6.pdf)
Supplement: Supplementary file [file 2020.03.05.20031500-6.pdf]

**Table S3.** *Ex vivo* IFN- $\gamma$  ELISpot results on frozen PBMCs depleted of CD4+ or CD8+ T cells.

| Group | Patient ID | Frozen PBMCs                       |                                           |                                           | Fresh PBMCs                        |
|-------|------------|------------------------------------|-------------------------------------------|-------------------------------------------|------------------------------------|
|       |            | Whole PBMCs (SFCx10 <sup>6</sup> ) | CD4 depleted PBMCs (SFCx10 <sup>6</sup> ) | CD8 depleted PBMCs (SFCx10 <sup>6</sup> ) | Whole PBMCs (SFCx10 <sup>6</sup> ) |
| 2     | VAN-003    | 0                                  | 0                                         | 0                                         | 88                                 |
| 2     | VAN-802    | 166                                | 43                                        | 127                                       | 253                                |
| 3     | VAN-011    | 0                                  | 0                                         | 0                                         | 152                                |
| 4     | VAN-031    | 0                                  | 0                                         | 0                                         | 132                                |
| 5     | VAN-029    | 59                                 | 0                                         | 91                                        | 308                                |
| 5     | VAN-801    | 0                                  | 0                                         | 0                                         | 0                                  |
| 5     | VAN-812    | 101                                | 97                                        | 0                                         | 151                                |
| 6     | VAN-808    | 75                                 | 100                                       | 0                                         | 224                                |
| 7     | VAN-007    | 0                                  | 0                                         | 0                                         | 181                                |
